# Supplementary material
Source: MDPI journal article supplement (https://www.mdpi.com/2073-4441/12/7/1907)
Supplement: s1 [file s1]

Article

# Beyond Human Interventions on Complex Bays: Effects on Water and Wave Dynamics (Study case Cádiz Bay, Spain) - Supporting Information

Carmen Zarzuelo <sup>1</sup>, Alejandro López-Ruiz <sup>1\*</sup>, and Miguel Ortega-Sánchez <sup>2</sup>

<sup>1</sup> Departamento de Ingeniería Aeroespacial y Mecánica de Fluidos, Universidad de Sevilla, Camino de los Descubrimientos s/n, 41092, Seville, Spain; czarzuelo@us.es (C.Z.); alopez50@us.es (A.L.-R.)

<sup>2</sup> Andalusian Institute for Earth System Research, University of Granada, Avda. del Mediterráneo, s/n, 18006, Granada, Spain; miguelos@ugr.es (M.O.-S.)

\* Correspondence: alopez50@us.es

Version June 29, 2020 submitted to Water

**Supplementary Materials:** Supplementary information includes table S1 with the Delft3D calibrated model parameters, tables S2 and S3 with the calibration and testing correlation coefficients, respectively, and Figures S1, S2, S3 and S4 with the results for the calibration and testing of the model for the hydrodynamics and water quality variables, respectively.

1. Tables S1, S2 and S3
2. Figures S1, S2, S3 and S4

© 2020 by the authors. Submitted to *Water* for possible open access publication under the terms and conditions of the Creative Commons Attribution (CC BY) license (<http://creativecommons.org/licenses/by/4.0/>).

| Parameter                     | Specification                                                                                      |
|-------------------------------|----------------------------------------------------------------------------------------------------|
| Domain                        | 6.8°W to 6.0°W<br>36.66°N to 36.38°W                                                               |
| Oceanic boundary forcing      | Water level with harmonic constituents                                                             |
| Transport conditions          | Salinity and water temperature                                                                     |
| Bottom roughness              | Constant Chézy's roughness coefficient (U(80), V(60))                                              |
| Horizontal eddy viscosity     | 1 m <sup>2</sup> s <sup>-1</sup>                                                                   |
| Horizontal eddy diffusivity   | 20 m <sup>2</sup> s <sup>-1</sup>                                                                  |
| Wind drag coefficient         | 0.005                                                                                              |
| Heat flux model               | Ocean                                                                                              |
| Secchi depth                  | 2 m                                                                                                |
| Dalton number                 | 0.0013                                                                                             |
| Stanton number                | 0.0013                                                                                             |
| Included variables            | Solar radiation, relative humidity, air temperature, cloud coverage, evaporation and precipitation |
| Depth-induced breaking        | $\alpha=1, \beta=0.73$                                                                             |
| Non-linear triad interactions | $\alpha=0.1, \beta=9$                                                                              |
| Bottom friction               | Collins coefficient 0.02                                                                           |
| Diffraction                   | Smoothing coefficient 0.9, smoothing steps 900                                                     |
| Time step                     | 0.1 min                                                                                            |

**Table S1.** Parameters of the Delft3D numerical simulations.

| Instr.                                  | $\eta$   |                |      | $V_e$      |                |      | $V_n$      |                |      |
|-----------------------------------------|----------|----------------|------|------------|----------------|------|------------|----------------|------|
|                                         | RMSE (m) | R <sup>2</sup> | S    | RMSE (m/s) | R <sup>2</sup> | S    | RMSE (m/s) | R <sup>2</sup> | S    |
| Calibration (January 4th to 22th, 2012) |          |                |      |            |                |      |            |                |      |
| I1                                      | 0.10     | 0.99           | 0.99 | 0.09       | 0.92           | 0.88 | 0.27       | 0.94           | 0.71 |
| I3                                      | 0.11     | 0.99           | 0.99 | 0.14       | 0.95           | 0.78 | 0.38       | 0.95           | 0.64 |
| Testing (May 24th to June, 10th 2013)   |          |                |      |            |                |      |            |                |      |
| I3                                      | 0.16     | 0.99           | 0.99 | 0.15       | 0.88           | 0.81 | 0.36       | 0.88           | 0.71 |
| I3a                                     | 0.23     | 0.98           | 0.98 | 0.13       | 0.93           | 0.91 | 0.46       | 0.84           | 0.59 |
| I3b                                     | 0.23     | 0.99           | 0.98 | 0.12       | 0.67           | 0.79 | 0.26       | 0.76           | 0.65 |

**Table S2.** Results for the hydrodynamic calibration and testing. RMSE refers to root mean squared error, R<sup>2</sup> is correlation and S is skill.

| Instr.                                  | Temperature |                |             | Salinity    |                |             |
|-----------------------------------------|-------------|----------------|-------------|-------------|----------------|-------------|
|                                         | RMSE (°C)   | R <sup>2</sup> | S           | RMSE (psu)  | R <sup>2</sup> | S           |
| Calibration (January 4th to 22th, 2012) |             |                |             |             |                |             |
| I1                                      | 0.45 / 0.17 | 0.81 / 0.91    | 0.67 / 0.82 | 0.08 / 0.06 | 0.79 / 0.84    | 0.78 / 0.67 |
| I2                                      | 0.25 / 0.17 | 0.60 / 0.77    | 0.58 / 0.69 | 0.09 / 0.05 | 0.53 / 0.72    | 0.52 / 0.66 |
| I3                                      | 0.25 / 0.18 | 0.84 / 0.76    | 0.79 / 0.69 | 0.07 / 0.06 | 0.71 / 0.82    | 0.56 / 0.58 |
| Testing (May 24th to June, 10th 2013))  |             |                |             |             |                |             |
| I3                                      | 0.13 / 0.07 | 0.92 / 0.93    | 0.93 / 0.94 | 0.05 / 0.02 | 0.82 / 0.89    | 0.86 / 0.92 |
| I3a                                     | 0.14 / 0.10 | 0.87 / 0.88    | 0.82 / 0.83 | 0.02 / 0.01 | 0.82 / 0.85    | 0.77 / 0.79 |
| I3b                                     | 0.13 / 0.08 | 0.79 / 0.79    | 0.82 / 0.83 | 0.03 / 0.02 | 0.76 / 0.79    | 0.77 / 0.81 |

**Table S3.** Results for the temperature and salinity calibration and testing. On each cell, the first and second values represent the instantaneous and daily-scale results, respectively. RMSE refers to root mean squared error, R<sup>2</sup> is correlation and S is skill.

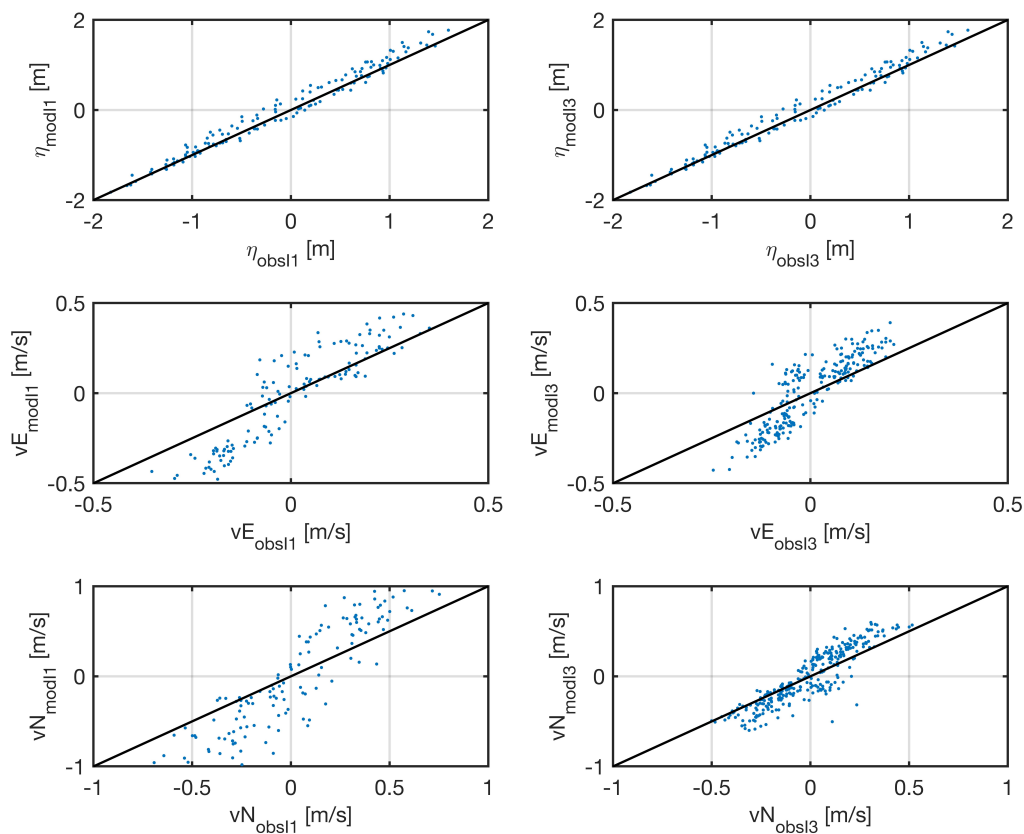

**Figure S1.** Results for the water level and velocity calibration. Upper, mid and lower panels correspond to water level and east and north velocity, respectively. Left (right) panels correspond to results for the instruments I1 (I3).

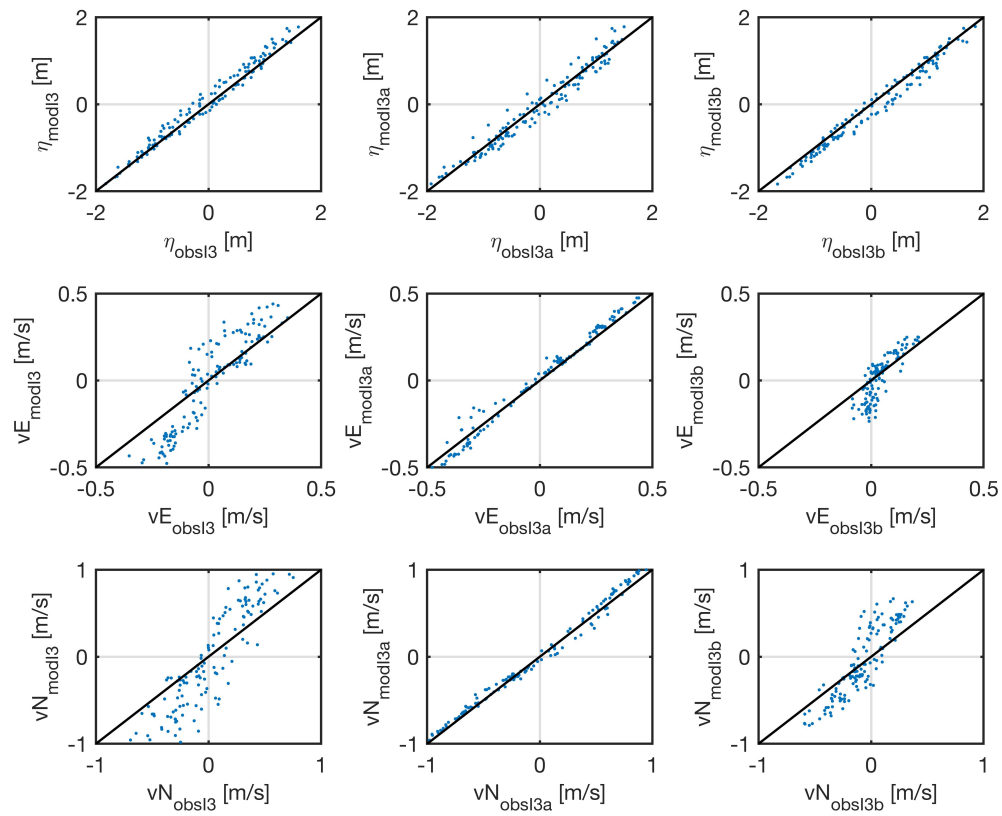

**Figure S2.** Results for the water level and velocity testing. Upper, mid and lower panels correspond to water level and east and north velocity, respectively. Left to right panel correspond to results for the instruments I3, I3a and I3b, respectively.

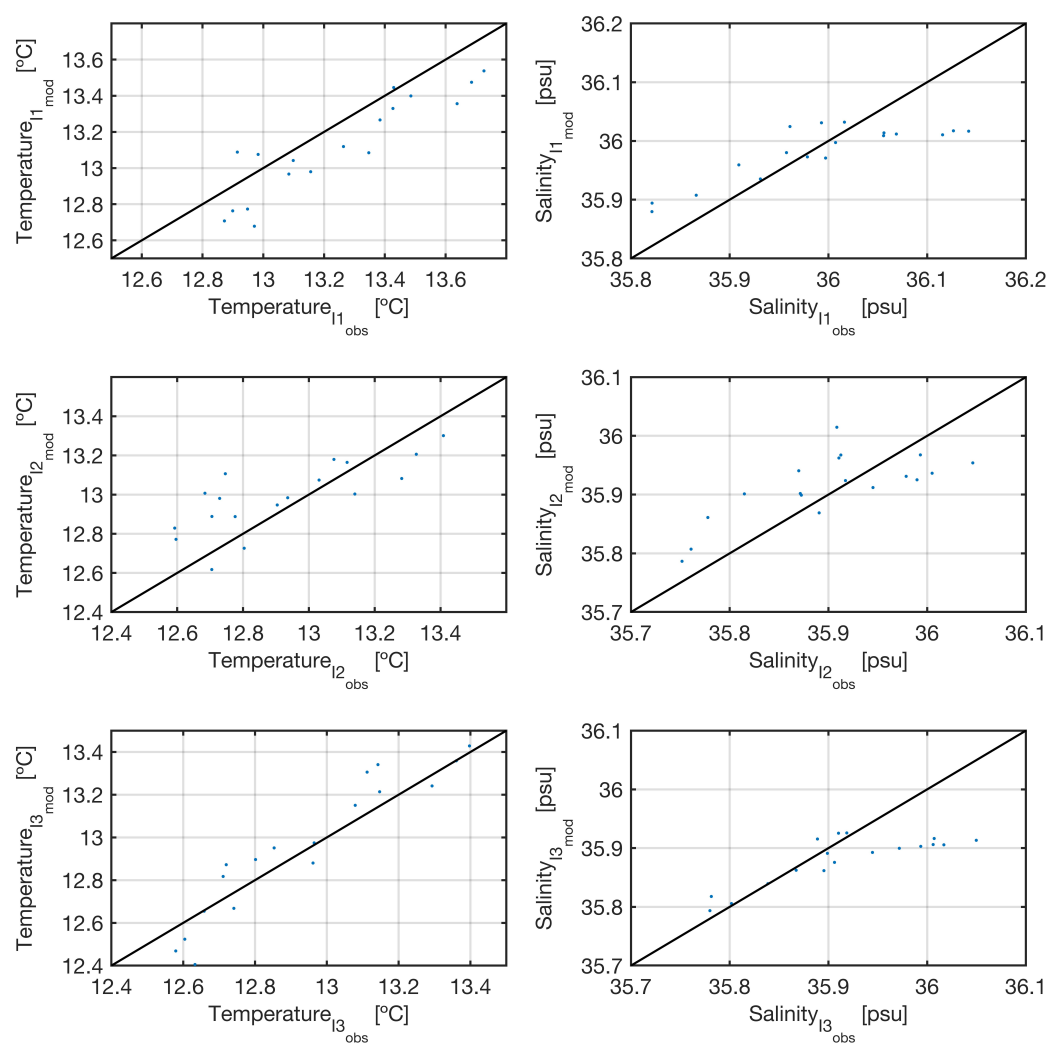

**Figure S3.** Results for the salinity and temperature calibration. Left and right panel correspond to temperature and salinity, respectively. Upper, mid and lower panel correspond to results for instruments I1, I2 and I3, respectively.

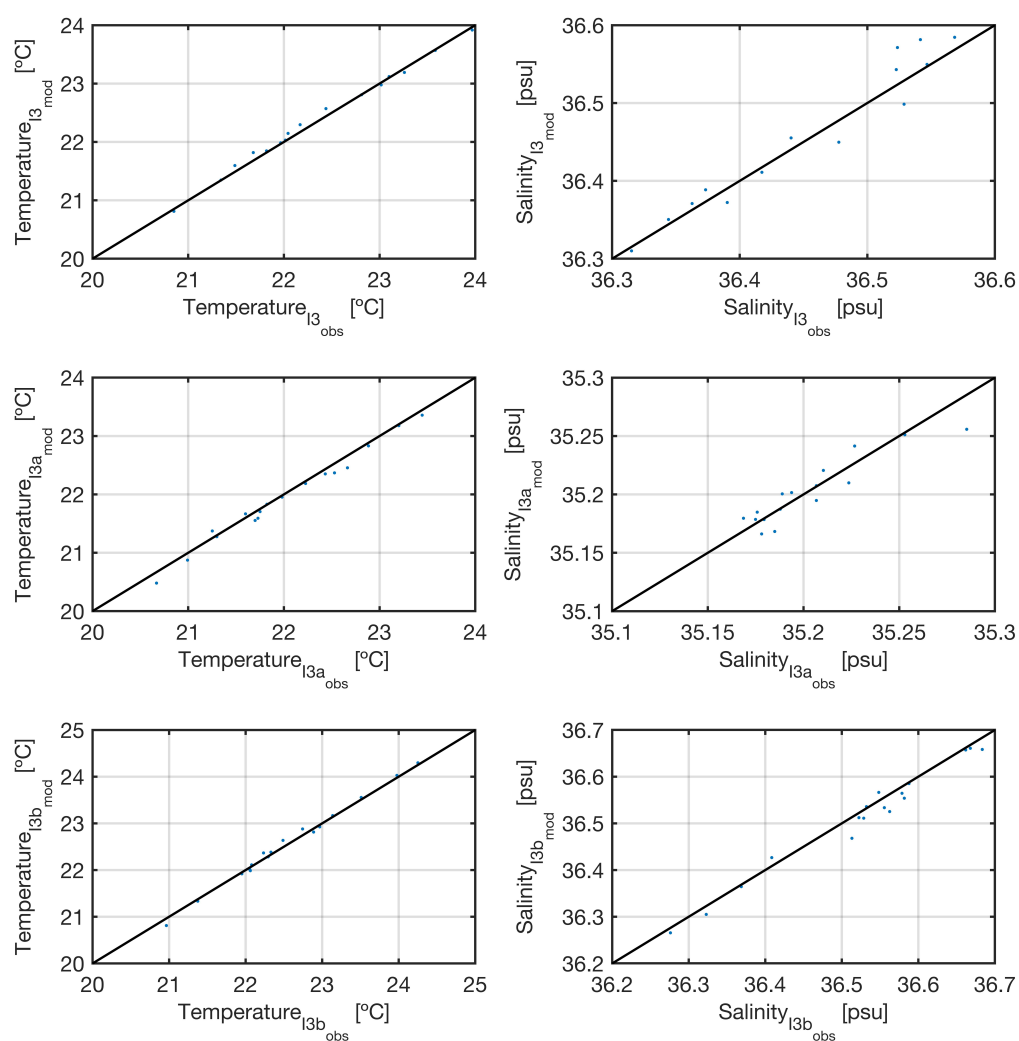

**Figure S4.** Results for the salinity and temperature testing. Left and right panel correspond to temperature and salinity, respectively. Upper, mid and lower panels correspond to results for instruments I3, I3a and I3b, respectively.
